# Supplementary figures and images for: Surface functionality of sub- to full-monolayer organic coverage of water aerosols determined by molecular dynamics simulations
Source: Royal Society of Chemistry journal article supplement (doi:10.1039/d2ea00148a), 2023-01-01

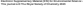

Supplement: d2ea00148a12.pdf [file d2ea00148a12.pdf]

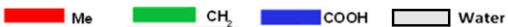

70 STC

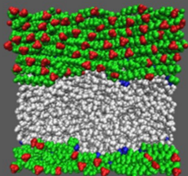

80 STC

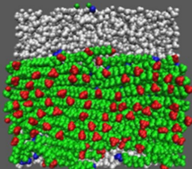

90 STC

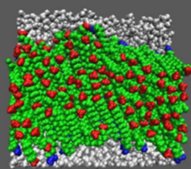

100 STC

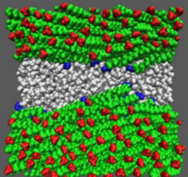

110 STC

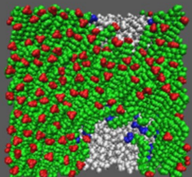

120 STC

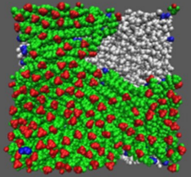

130 STC

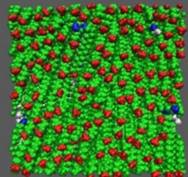

140 STC

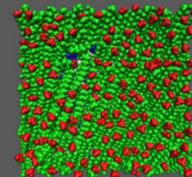

150 STC

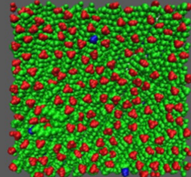

Supplement: d2ea00148a13.pdf [file d2ea00148a13.pdf]

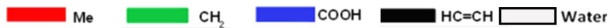

70 OLE

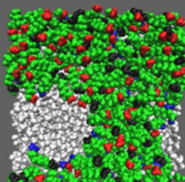

80 OLE

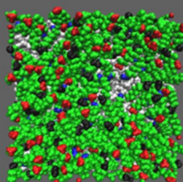

90 OLE

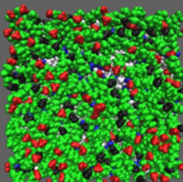

100 OLE

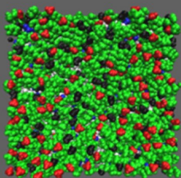

110 OLE

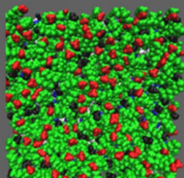

120 OLE

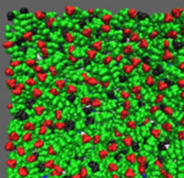

130 OLE

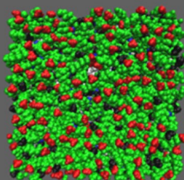

140 OLE

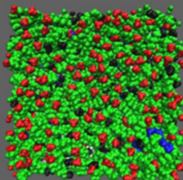

150 OLE

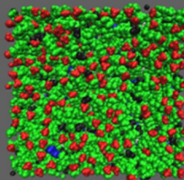

Supplement: d2ea00148a14.pdf [file d2ea00148a14.pdf]

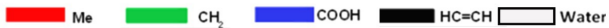

70 LLC

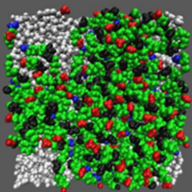

80 LLC

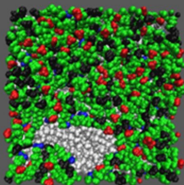

90 LLC

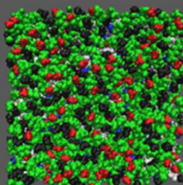

100 LLC

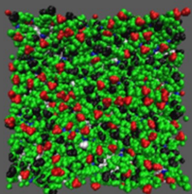

110 LLC

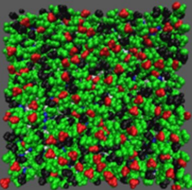

120 LLC

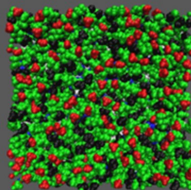

130 LLC

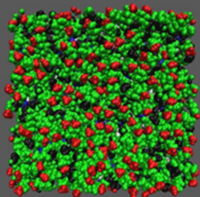

140 LLC

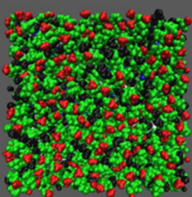

150 LLC

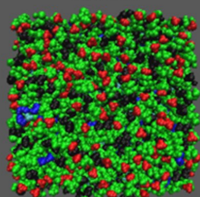

Supplement: d2ea00148a15.pdf [file d2ea00148a15.pdf]

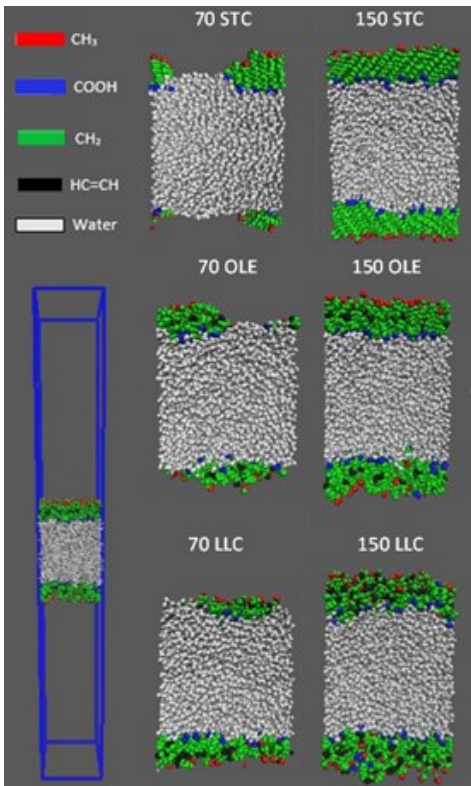

Supplement: d2ea00148a16.pdf [file d2ea00148a16.pdf]

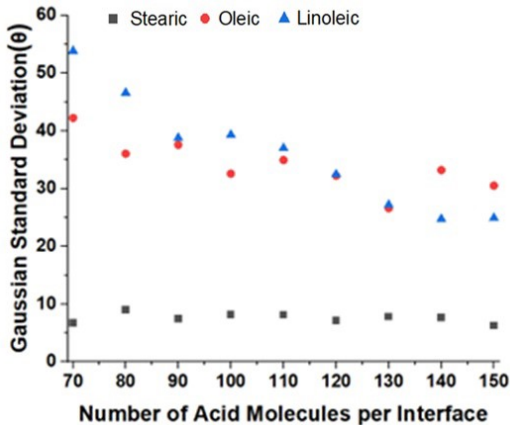

Supplement: d2ea00148a17.pdf [file d2ea00148a17.pdf]

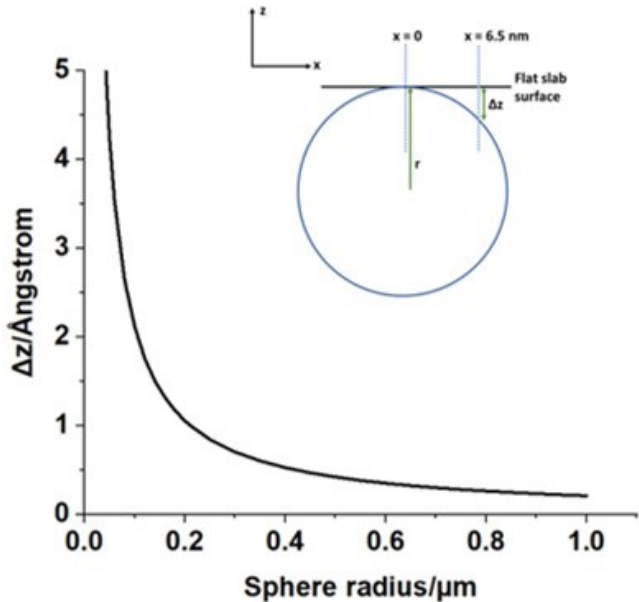

Supplement: d2ea00148a2.pdf [file d2ea00148a2.pdf]

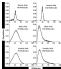

Supplement: d2ea00148a3.pdf [file d2ea00148a3.pdf]

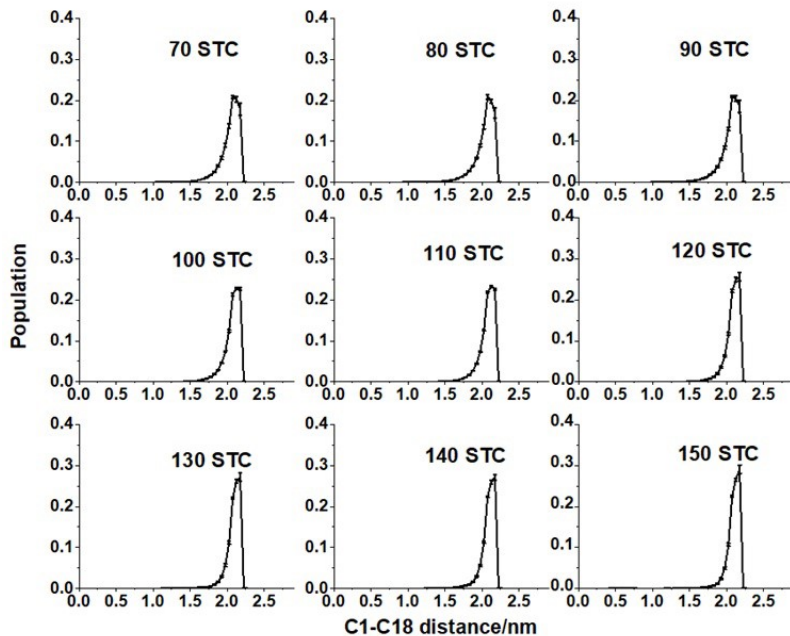

Supplement: d2ea00148a4.pdf [file d2ea00148a4.pdf]

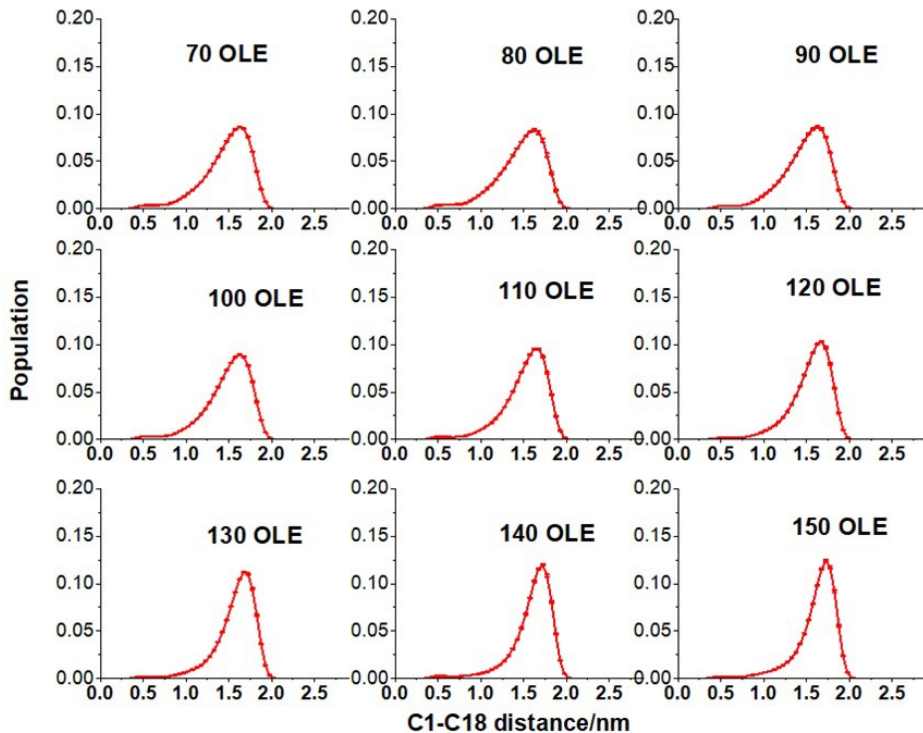

Supplement: d2ea00148a5.pdf [file d2ea00148a5.pdf]

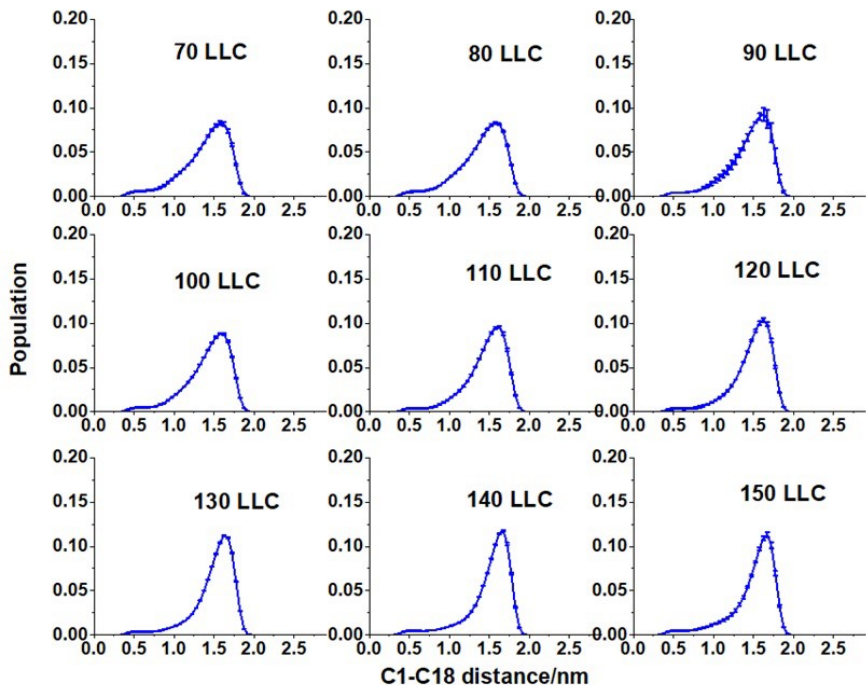

Supplement: d2ea00148a6.pdf [file d2ea00148a6.pdf]

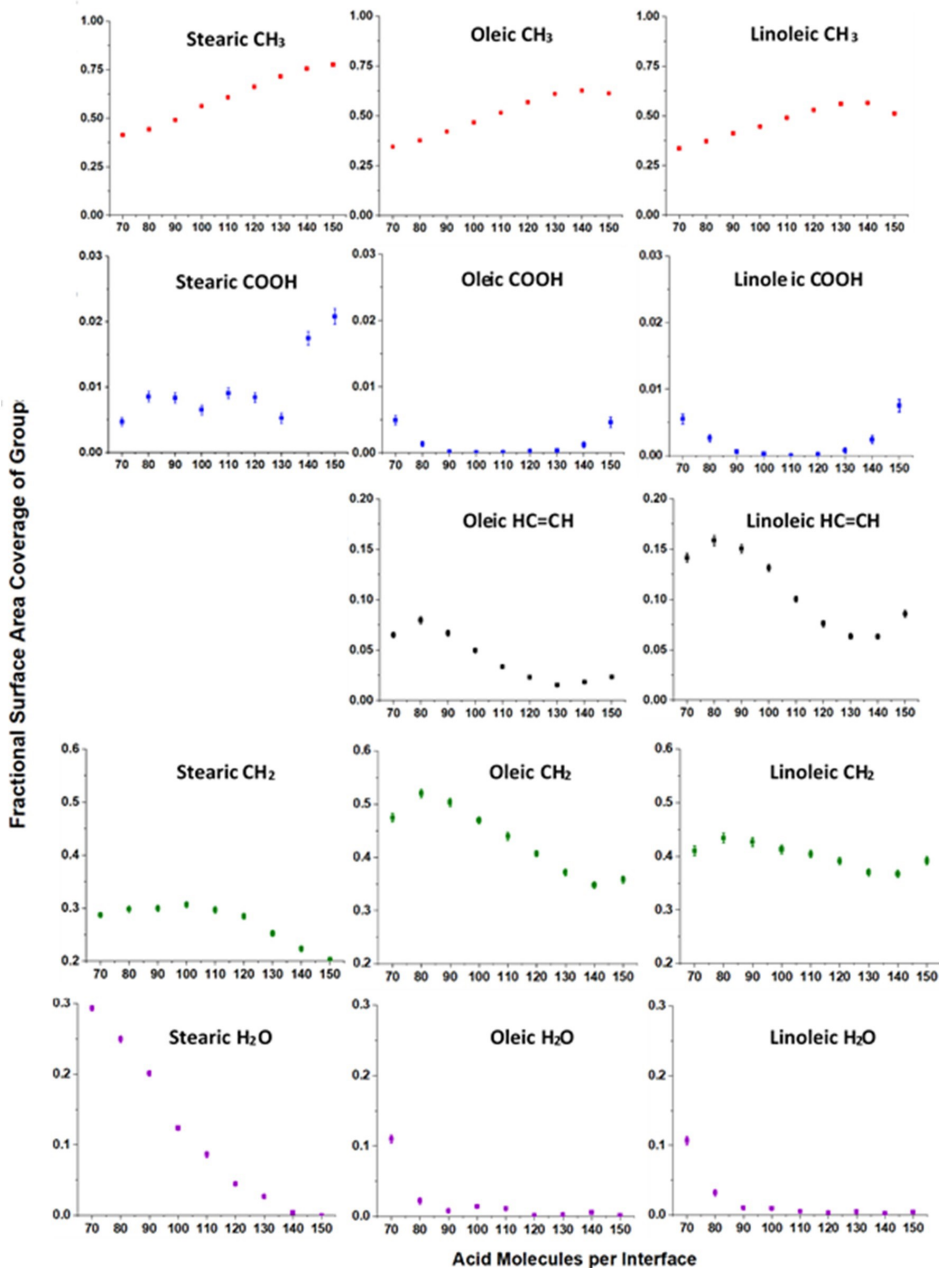

Supplement: d2ea00148a7.pdf [file d2ea00148a7.pdf]

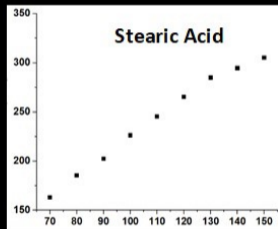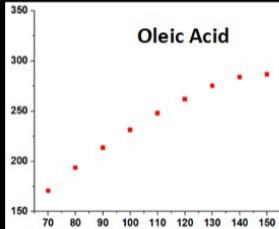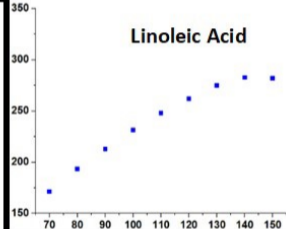

Supplement: d2ea00148a8.pdf [file d2ea00148a8.pdf]

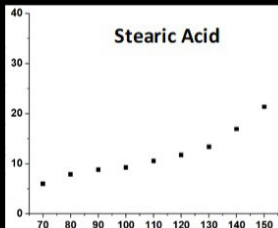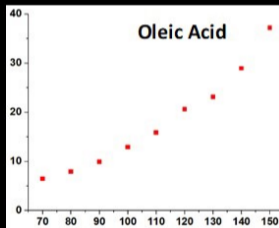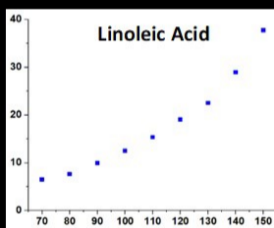

Supplement: d2ea00148a9.pdf [file d2ea00148a9.pdf]
